# Supplementary material for: Response of Freshwater Biofilms to Antibiotic Florfenicol and Ofloxacin Stress: Role of Extracellular Polymeric Substances
Source: MDPI journal article supplement (doi:10.3390/ijerph16050715), 2019-02-27
Supplement: s1 [file s1]

## *Supplementary Material*

# **Response of Freshwater Biofilms to Antibiotic Florfenicol and Ofloxacin Stress: Role of Extracellular Polymeric Substances**

**Chaoqian Wang, Deming Dong, Liwen Zhang, Ziwei Song, Xiuyi Hua and Zhiyong Guo \***

Key Laboratory of Water Resources and Environment, College of New Energy and Environment, Jilin University, Changchun 130012, China; wangcq16@mails.jlu.edu.cn (C.W.); dmdong@jlu.edu.cn (D.D.); zhangliwen@jlu.edu.cn (L.Z.); songzw18@mails.jlu.edu.cn (Z.S.); huaxy@jlu.edu.cn (X.H.)

\* Correspondence: zyguo@jlu.edu.cn; Tel.: +86-0431-85168429

## Information S1 Spectral measurements of extracellular polymeric substances

A part of the above supernatants purified with an 8000-Da semipermeable membrane to remove residues and salt was lyophilized to obtain EPS samples for spectral analysis. The freeze-dried EPS samples were dissolved in Milli Q water, and a series of solutions containing 100 mg·L<sup>-1</sup> of EPS and 0 to 2.5 mg·L<sup>-1</sup> of antibiotics were prepared in 40-mL vials. The vials were kept in dark and shaken in a water-bath shaker at 150 rpm for 24 h at 25 °C. After that, 5 mL of mixture was collected and passed through a 0.45-μm filter for three-dimensional excitation-emission matrix (3D-EEM) fluorescence spectra analysis. The 3D-EEM fluorescence spectra (F-2700, Hitachi, Japan) was measured with subsequent scanning emission wavelength of 300 to 600 nm at 0.5-nm increments by excitation wavelengths of 250 to 450 nm at 10-nm increments. The slits for both excitation and emission were 5 nm, and the scan speed was 1200 nm·min<sup>-1</sup>.

The freeze-dried EPS samples and KBr were mixed at a ratio of 1:100 and homogenized in an agate grinder. The mixture was compressed into tablets. The interactions between the EPS and the two antibiotics were measured with an infrared spectrometer (IR, IRAffinity-1S, Shimadzu, Japan), and the spectra in the range of 4000 to 400 cm<sup>-1</sup> were recorded with 20 replications at a resolution of 2 cm<sup>-1</sup>.

Table S1. Basic information on florfenicol and ofloxacin.

| Antibiotic  | Molecular structure                                                                 | CAS Number | Molecular weight | Dissociation Constant | Partition Coefficient | Water solubility |
|-------------|-------------------------------------------------------------------------------------|------------|------------------|-----------------------|-----------------------|------------------|
| Florfenicol | 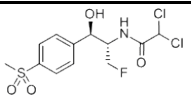  | 73231-34-2 | 358.21           | 9.03                  | -0.04                 | 1.32             |
| Ofloxacin   |  | 82419-36-1 | 361.37           | 6.10/8.28             | -0.39                 | 2.55             |

Table S2. Information on the Nanhu Lake and some physicochemical properties of the lake water.

| Latitude | Longitude | Depth Max. | DOC <sup>a</sup>      | TN <sup>b</sup>       | TP <sup>c</sup>       | pH      |
|----------|-----------|------------|-----------------------|-----------------------|-----------------------|---------|
| (North)  | (East)    | (m)        | (mg·L <sup>-1</sup> ) | (mg·L <sup>-1</sup> ) | (mg·L <sup>-1</sup> ) |         |
| 43°51'   | 125°18'   | 6.5        | 8.61                  | 1.16                  | 0.15                  | 7.4-7.6 |

<sup>a</sup> DOC is the dissolved organic carbon.

<sup>b</sup> TN is the total nitrogen.

<sup>c</sup> TP is the total phosphorus.
